# Supplementary material for: Disruption of the Interfacial Membrane Leads to Magnaporthe oryzae Effector Re-location and Lifestyle Switch During Rice Blast Disease
Source: PubMed Central journal article supplement (PMC8248803; doi:10.3389/fcell.2021.681734), 2021-06-17

Supplementary Figure 1

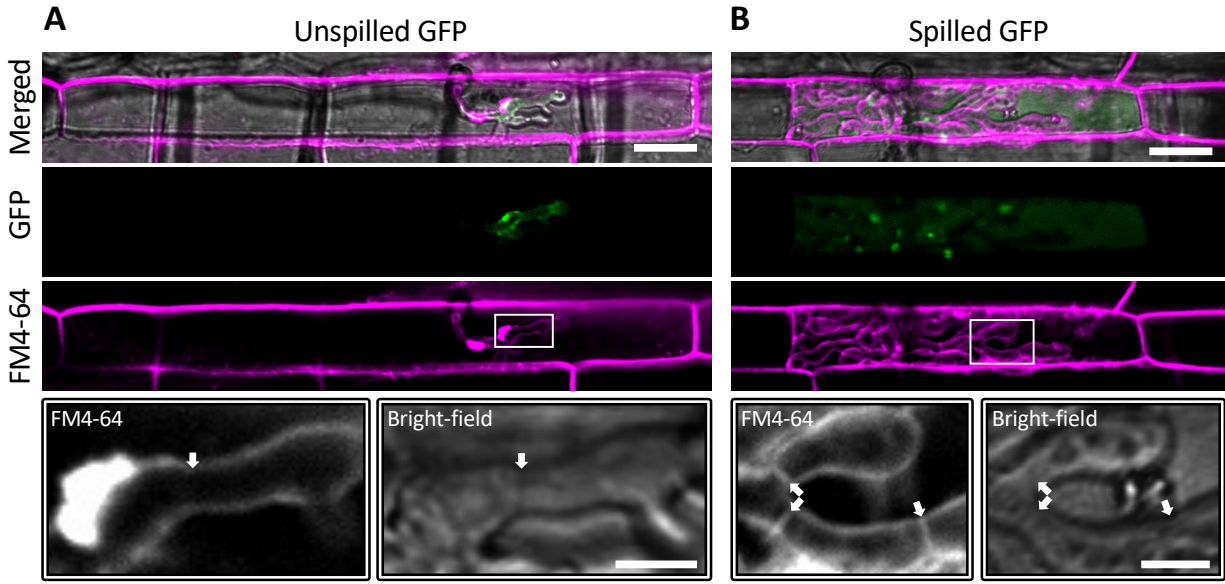

Supplement: Image_1.pdf [file Image_1.pdf]
