# Supplementary material for: Disruption of the Interfacial Membrane Leads to Magnaporthe oryzae Effector Re-location and Lifestyle Switch During Rice Blast Disease
Source: PubMed Central journal article supplement (PMC8248803; doi:10.3389/fcell.2021.681734), 2021-06-17
Supplement: Image_4.pdf [file Image_4.pdf]

Supplementary Figure 4

| <b>Spill pattern</b>             | <b>Representative infection</b>                                                    | <b># out of 155 infections</b> | <b>% of infections</b> |
|----------------------------------|------------------------------------------------------------------------------------|--------------------------------|------------------------|
| Cytoplasmic                      | 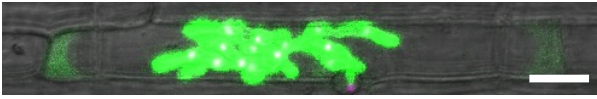 | 69                             | 44.5                   |
| Homogenous                       |  | 75                             | 48.4                   |
| Vacuolar                         |  | 2                              | 1.3                    |
| Cytoplasmic with some in vacuole |  | 5                              | 3.2                    |
| Vacuolar with some in cytoplasm  |  | 1                              | 0.7                    |
| Ambiguous                        |  | 3                              | 1.9                    |
