# Supplementary material for: Disruption of the Interfacial Membrane Leads to Magnaporthe oryzae Effector Re-location and Lifestyle Switch During Rice Blast Disease
Source: PubMed Central journal article supplement (PMC8248803; doi:10.3389/fcell.2021.681734), 2021-06-17
Supplement: Table_1.pdf [file Table_1.pdf]

**Supplementary Table 1. *Magnaporthe oryzae* transformants used in this study**

| <b>Strain</b>        | <b>Used in</b>                                                    | <b>Description<br/>[Recipient strain; Plasmid used]</b>                                                                                                                                                                                                                          |
|----------------------|-------------------------------------------------------------------|----------------------------------------------------------------------------------------------------------------------------------------------------------------------------------------------------------------------------------------------------------------------------------|
| CKF315 <sup>a</sup>  | Figures 5A and 5C                                                 | Transformant expressing the Bas4 signal peptide fused to EGFP under control of the <i>BAS4</i> promoter<br>[O-137 <sup>b</sup> ; pBV324]; same as KV97 (Mosquera et al., 2009)                                                                                                   |
| CKF1616              | Figure 7                                                          | Transformant expressing both a fusion of the Pwl2 coding sequence with mCherry:NLS under control of the <i>PWL2</i> promoter and a fusion of the Bas4 coding sequence with EGFP under control of the <i>BAS4</i> promoter<br>[O-137; pBV591]; same as KV121 (Khang et al., 2010) |
| CKF1737              | Figure 1B                                                         | Transformant expressing a fusion of the Bas4 coding sequence with Dendra2 under control of the <i>BAS4</i> promoter<br>[O-137; pCK1244]                                                                                                                                          |
| CKF1996              | Figures 2B, 2C, and 3A;<br>Supplemental Figure 2A and 2B          | Transformant expressing both a fusion of the Bas4 signal peptide fused to EGFP under control of the <i>BAS4</i> promoter and a cytoplasmic tdTomato under control of the constitutive promoter of the <i>M. oryzae</i> ribosomal protein 27<br>[CKF315; pCK1292]                 |
| CKF2180 <sup>a</sup> | Supplemental Figure 1                                             | Transformant expressing the Bas4 signal peptide fused to EGFP under control of the <i>BAS4</i> promoter<br>[O-137; pBV324]                                                                                                                                                       |
| CKF2187              | Figures 4B, 4C, and 6A;<br>Supplemental Figures 3B, 3C, 3D, and 4 | Transformant expressing both a fusion of the Bas4 signal peptide fused to EGFP under control of the <i>BAS4</i> promoter and a fusion of histone H1 with tdTomato under control of the constitutive promoter P27<br>[O-137; pCK1312]                                             |
| CKF3267              | Supplemental Figure 2C                                            | Transformant expressing the Bas4 signal peptide fused to mCherry under control of the <i>BAS4</i> promoter<br>[O-137; pCK1594]                                                                                                                                                   |

<sup>a</sup>Two independent transformants containing the same construct showing consistent fluorescence patterns

<sup>b</sup>*M. oryzae* strain O-137 was isolated from rice (*Oryza sativa*) in China (Orbach, et al. 2000).
