# Supplementary material for: Disruption of the Interfacial Membrane Leads to Magnaporthe oryzae Effector Re-location and Lifestyle Switch During Rice Blast Disease
Source: PubMed Central journal article supplement (PMC8248803; doi:10.3389/fcell.2021.681734), 2021-06-17
Supplement: Table_2.pdf [file Table_2.pdf]

**Supplementary Table 2. Key Plasmids Used in This Study**

| <b>Clone</b> | <b>Description</b>                                                                                                                                                                                                                                                                                                                             |
|--------------|------------------------------------------------------------------------------------------------------------------------------------------------------------------------------------------------------------------------------------------------------------------------------------------------------------------------------------------------|
| pBV324       | 1 kb <i>EcoRI-BamHI</i> fragment containing the <i>BAS4</i> promoter and 72 bp <i>BamHI-PstI</i> fragment encoding the Bas4 signal peptide cloned in the <i>EcoRI</i> and <i>PstI</i> sites of pBV176 (C-terminal translational fusion of EGFP to the Bas4 signal peptide); Khang et al., 2010                                                 |
| pBV591       | P <sub>PWL2</sub> :PWL2CDS:mCherry:NLS:Nopaline synthase gene (Nos) terminator and P <sub>BAS4</sub> :BAS4CDS:EGFP:Ter cloned in <i>EcoRI</i> and <i>HindIII</i> sites of pBHt2; Khang et al., 2010                                                                                                                                            |
| pCK1244      | 1.3 kb <i>EcoRI-BamHI</i> fragment containing the <i>BAS4</i> promoter and coding sequence from pBV587, 0.7 kb <i>BamHI-BsrGI</i> fragment containing Dendra2 from pCK1206, and 0.3 kb <i>BsrGI-SalI</i> fragment containing the Nos terminator from pBV360 (same as pAN583; Nelson et al., 2007) cloned into <i>EcoRI-SalI</i> sites of pBHt2 |
| pCK1292      | 0.5 kb <i>EcoRI-BamHI</i> fragment containing the P27 promoter from pBV167 and 1.7 kb <i>BamHI-HindIII</i> fragment containing tdTomato from pBV359 (same as pAN582; Nelson et al., 2007) cloned into <i>EcoRI-HindIII</i> sites of pBGt                                                                                                       |
| pCK1312      | 2.2 kb <i>EcoRI-BamHI</i> fragment of pBV229 containing the P27 promoter and histone H1 and 1.7 kb <i>BamHI-SalI</i> fragment of pBV359 containing tdTomato cloned into <i>EcoRI-XhoI</i> sites of pBV324                                                                                                                                      |
| pCK1594      | 1 kb <i>EcoRI-BamHI</i> fragment containing the <i>BAS4</i> promoter and sequence encoding the signal peptide from pBV722 and 1 kb <i>BamHI-HindIII</i> fragment of containing mCherry:Nos terminator cloned into <i>EcoRI-HindIII</i> sites of pBGt                                                                                           |
